# Supplementary material
Source: PubMed Central journal article supplement (PMC4363944)
Supplement: NIHMS664003-supplement-Ferryl_Suppl_.pdf [file NIHMS664003-supplement-Ferryl_Suppl_.pdf]

# Supporting Information:

## Ferryl Protonation in Oxoiron(IV) Porphyrins and its Role in Oxygen Transfer

Nicholas C. Boaz, Seth R. Bell, and John T. Groves\*

Department of Chemistry, Princeton University, Princeton New Jersey 08544, United States

[jtgroves@princeton.edu](mailto:jtgroves@princeton.edu). Telephone 609-258-3593

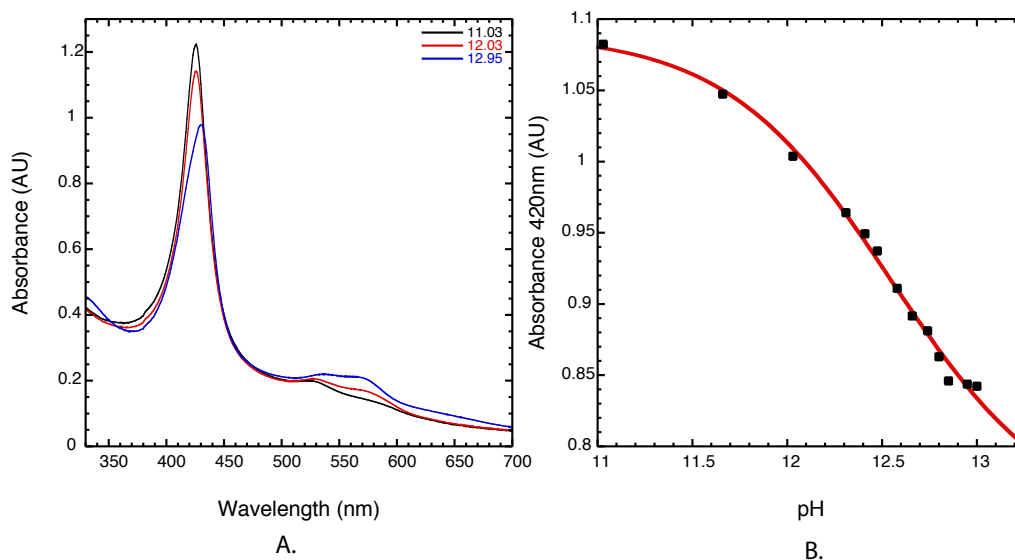

**S1.** (A.) UV-vis spectra of oxoFe<sup>IV</sup>TMPS (12 μM) at pH 11-13 (unbuffered water). For higher pH regimes the Soret  $\lambda_{\text{max}}$  red-shifted from 425 nm (oxoaquaFe<sup>IV</sup>TMPS shown in black) to a less intense band with a maximum at 431 nm (oxohydroxoFe<sup>IV</sup>TMPS). (B.) Plot of absorbance at 420 nm versus pH revealed a pK<sub>a</sub> at ~12.5.

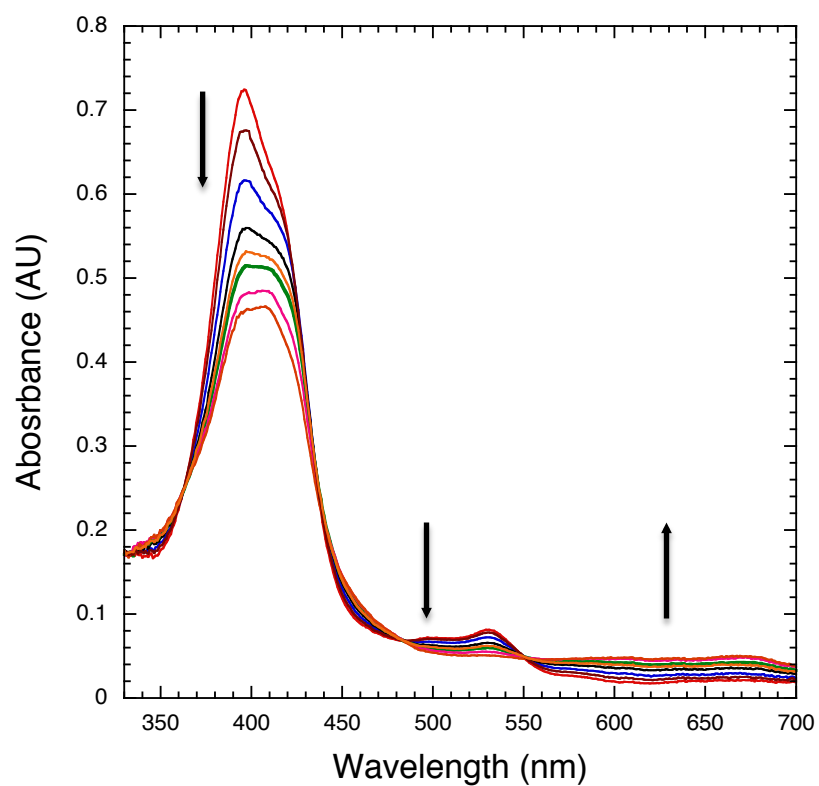

**S2.** Time-resolved spectra observed upon mixing FeTMPS (10  $\mu\text{M}$ ) with *m*CPBA (10  $\mu\text{M}$ ) at pH 5.4 (50 mM phosphate/acetate) resulting in the generation of oxoFe<sup>IV</sup>TMPS<sup>+</sup>. Selected traces shown for a 300 ms experiment. Concentrations presented are final concentrations after mixing.

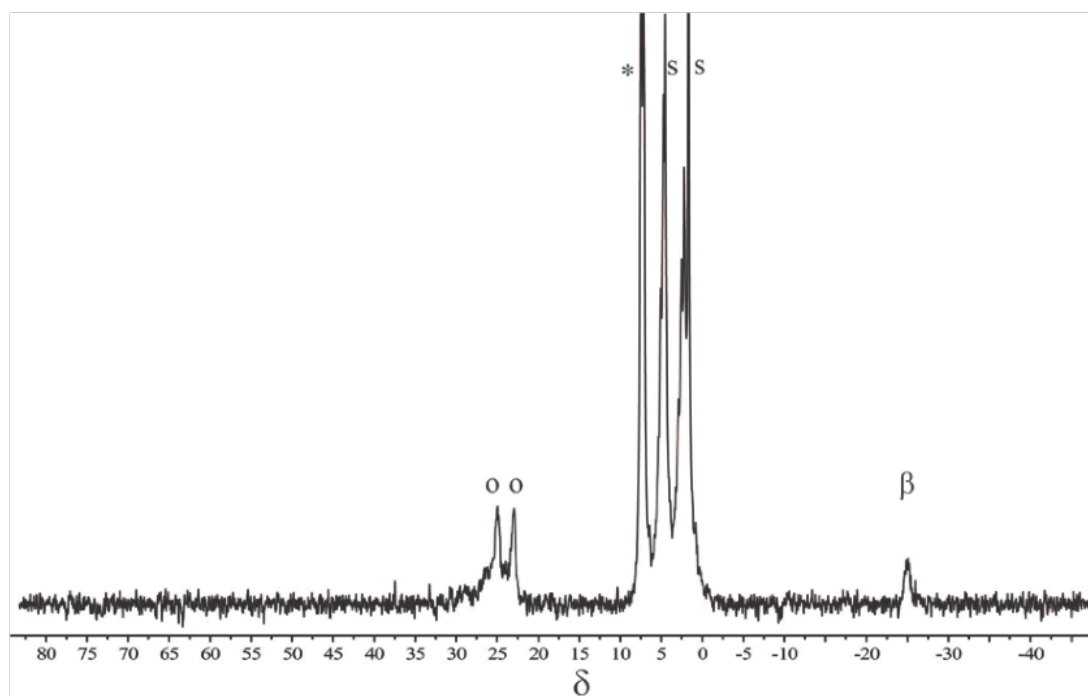

**S3.** <sup>1</sup>H NMR spectrum of oxoFe<sup>IV</sup>TMPS<sup>+</sup> obtained from the oxidation of bisquaFe<sup>III</sup>TMPS with *m*CPBA in 100 mM pD 5.05 deuterated acetic acid buffer at 5 °C; δ -26 (β-pyrrole) and δ 23, 25 (*o*-methyl), *m*CBA(\*), and solvent (s).

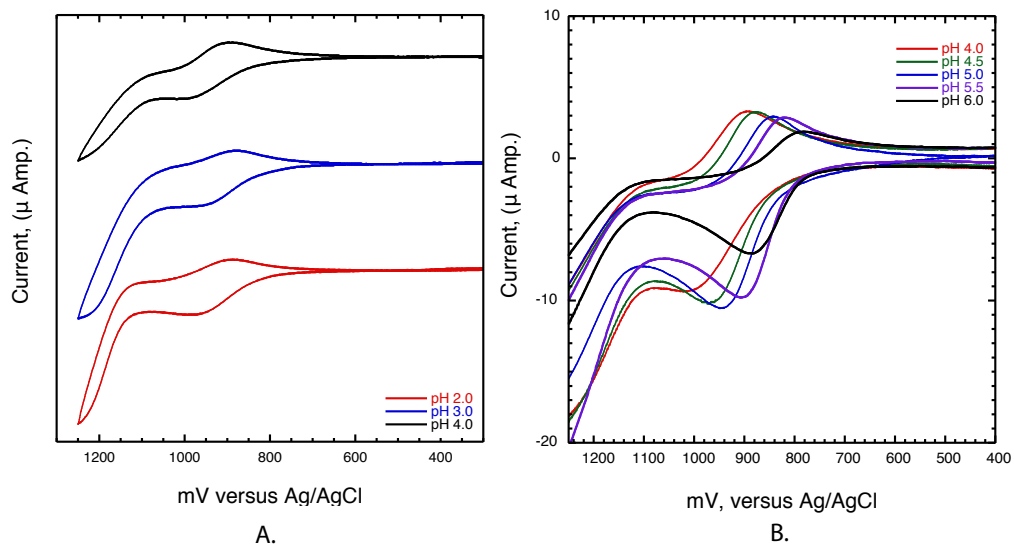

**S4.** (A). Cyclic voltammograms of Fe<sup>III</sup>TMPS at pH 2.0, 3.0 and 4.0. A pH independent wave was observed at 940 mV versus Ag/AgCl. (B.) Cyclic voltammograms of Fe<sup>III</sup>TMPS at pH 4.0, 4.5, 5.0, 5.5, and 6.0. At pH values greater than 4.0 the observed wave exhibited a pH dependence of -57 mV/pH unit. Fe<sup>III</sup>TMPS (1 mM) in 100 mM buffer (phosphate/acetate) using a glassy carbon working electrode, platinum wire counter electrode, and Ag/AgCl reference electrode.

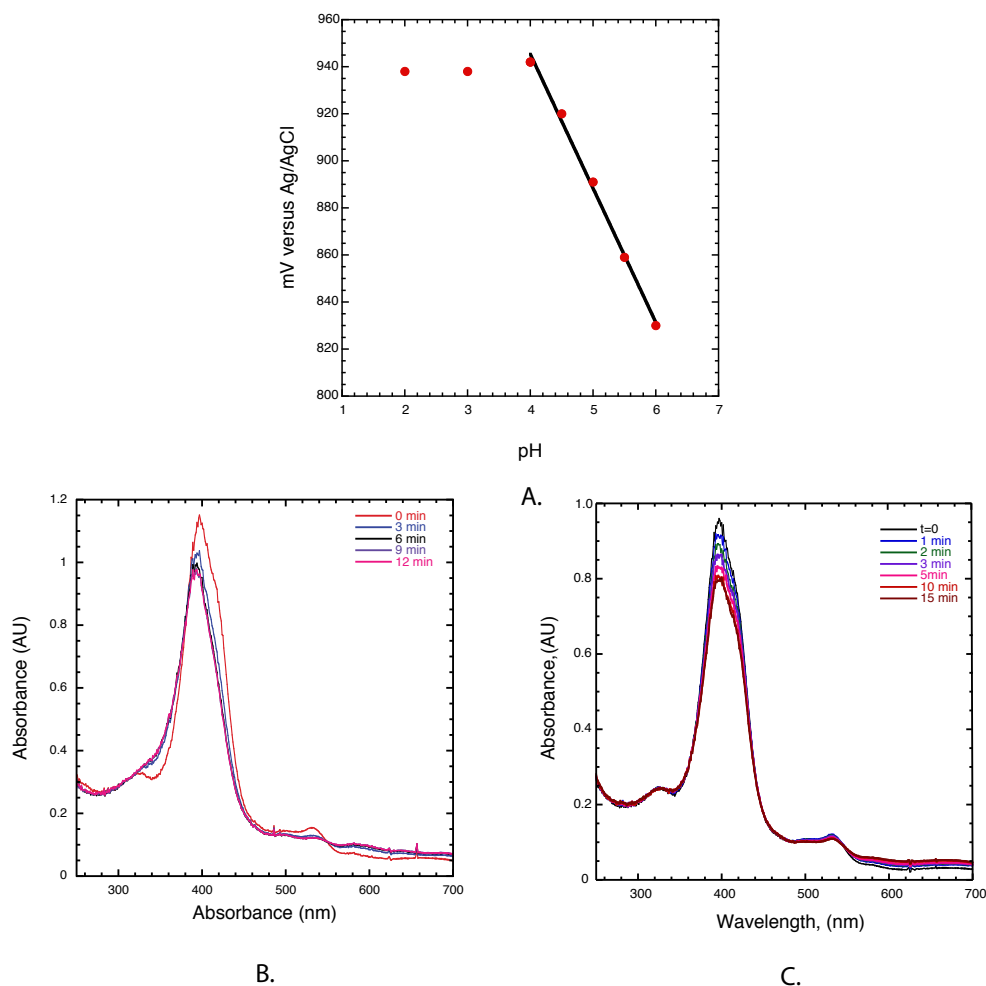

**S5.** (A) A Pourbaix plot of the CV redox waves shown in Figure S4B shows a pH independent component from pH 2.0 to pH 4.0. Above pH 4.0, the redox waves showed a slope of -57 mV/pH unit ( $R^2=0.99$ ). (B) Spectroelectrochemical oxidation of 150  $\mu\text{M}$  Fe<sup>III</sup>-TMPS at pH 2.0 (100 mM phosphate acetate buffer) over 12 min at 1100 mV yielded a new species with a Soret  $\lambda_{\text{max}}$  of 390 nm and an elevated Q-band feature at  $\sim 650$  nm matching the spectrum of the previously reported Fe<sup>III</sup>-TMPS<sup>+</sup> derived from oxoFe<sup>IV</sup>-TMPS.<sup>1</sup> (C) Spectroelectrochemical oxidation of 150  $\mu\text{M}$  Fe<sup>III</sup>-TMPS at pH 5.0 at 1200 mV vs Ag/AgCl yields an incomplete oxidation of Fe<sup>III</sup>-TMPS to oxoFe<sup>IV</sup>-TMPS. Spectroelectrochemical oxidation was performed in a 2 mm path length cuvette equipped with transparent platinum mesh working electrode, fritted platinum coil counter electrode, and Ag/AgCl reference electrode.

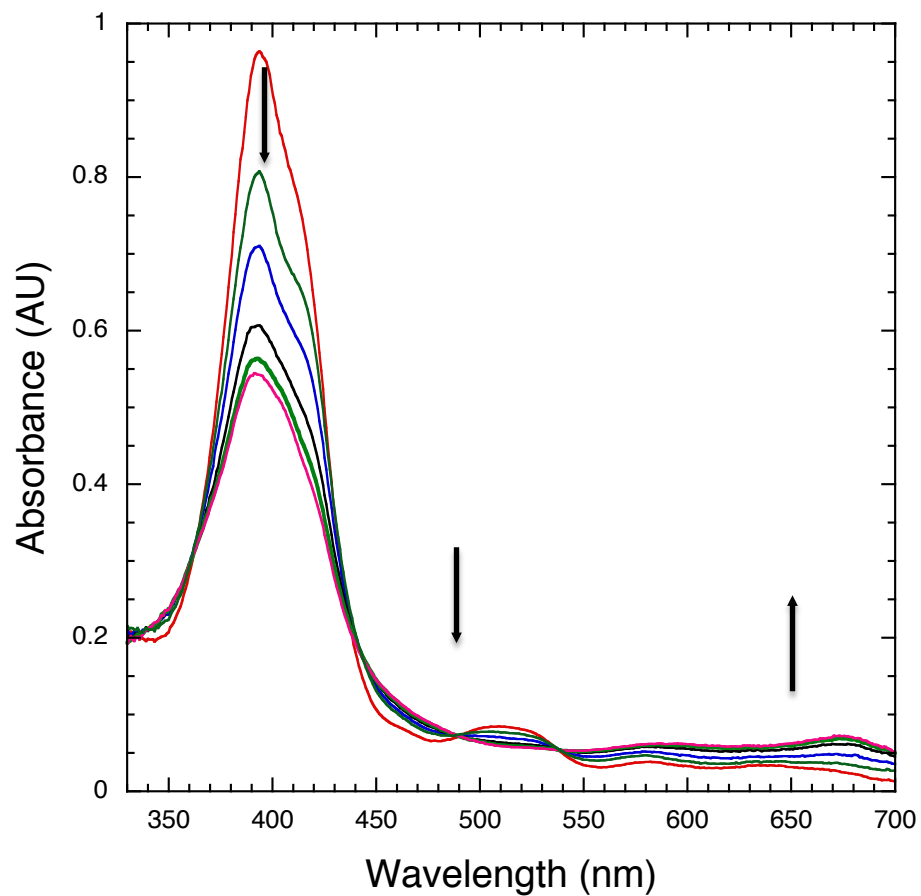

**S6.** Time-resolved spectra observed upon mixing FeTDCIPS (10  $\mu\text{M}$ ) with *m*CPBA (10  $\mu\text{M}$ ) at pH 5.0 (50 mM phosphate/acetate) resulting in the generation of oxoFe<sup>IV</sup>TDCIPS<sup>+</sup>. Selected traces shown for a 300 ms experiment. Concentrations presented are final concentrations after mixing.

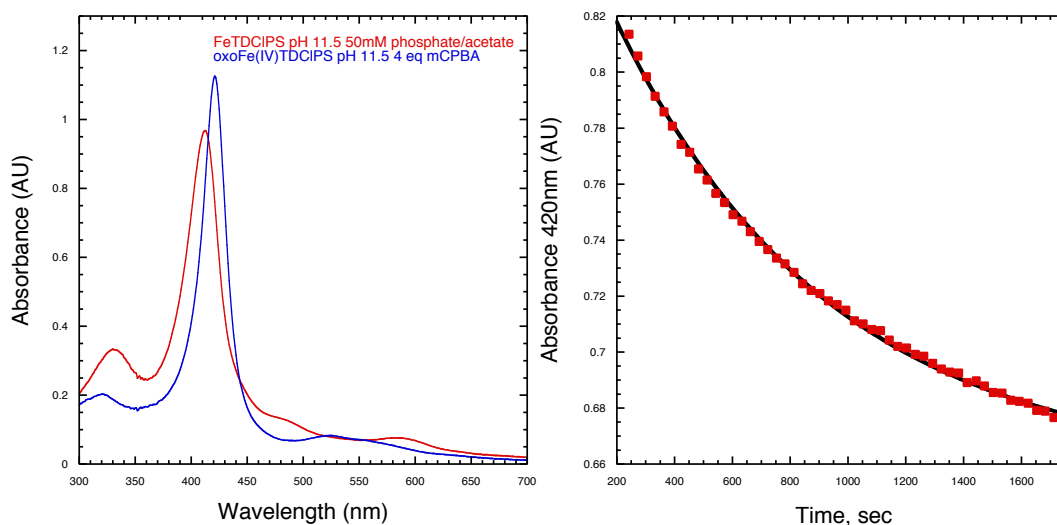

**S7.** (Left) Fe<sup>III</sup>TDCIPS (10  $\mu$ M) at pH 11.5 (50 mM phosphate/acetate buffer). Treatment of Fe<sup>III</sup>TDCIPS with 4 eq of *m*CPBA resulted in the formation of a new species with a sharper, blue shifted Soret band at 420 nm. Upon comparison with FeTSMP and FeTMPS we assign this species as oxoFe(IV)TDCIPS. (Right) The decay of oxoFe<sup>IV</sup> was measured by following the change in absorbance at 420 nm over time. Fitting these data to a single exponential equation (solid black line) resulted in a unimolecular decay rate constant of 0.00159 s<sup>-1</sup>.

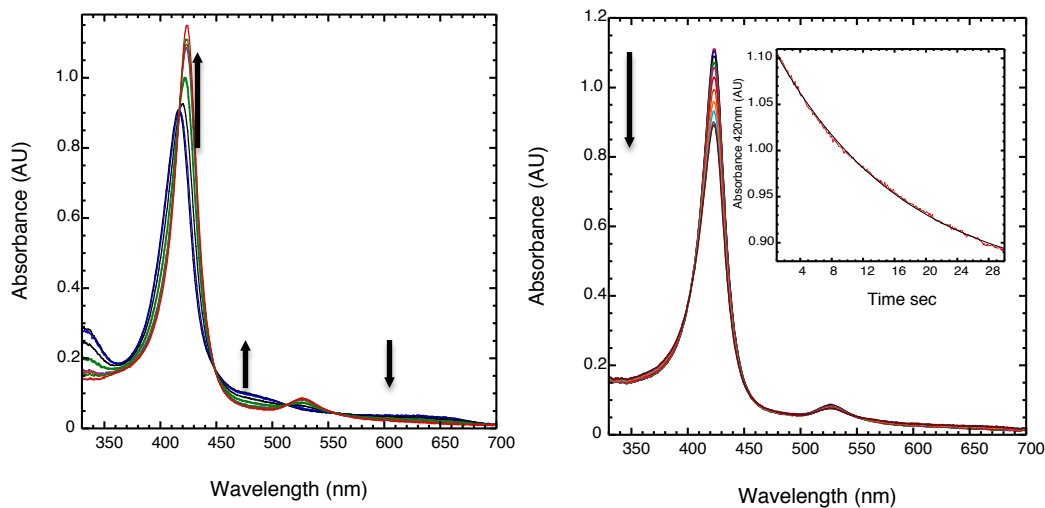

**S8.** (Left) Time-resolved spectra observed upon mixing FeTDPS (20  $\mu\text{M}$ ) with *m*CPBA (20  $\mu\text{M}$ ) at pH 11.5 (50 mM phosphate/acetate) to form oxoFe<sup>IV</sup>TDPS, which displayed a sharpened, red-shifted Soret band at 423 nm. Selected traces shown for a 300 ms experiment where the authentic spectrum for oxoFe<sup>IV</sup>TDPS was extracted using global fit analysis (red trace). (Right) Time resolved spectra of the spontaneous decay of oxoFe<sup>IV</sup>TDPS over the course of 30 s (partial bleaching). (Inset) Fitting the decay at 420 nm for oxoFe<sup>IV</sup>TDPS (red trace) to a single exponential function (black trace) afforded a rate constant of  $0.059 \pm 0.0007 \text{ s}^{-1}$ .



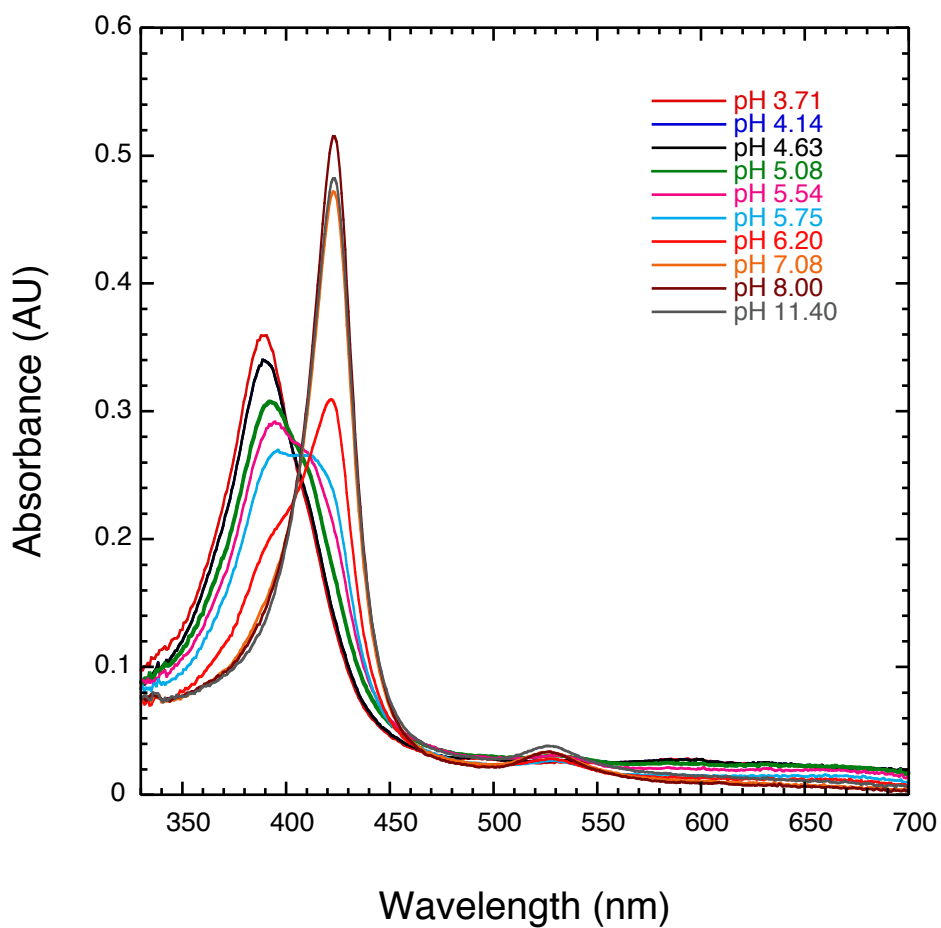

**S9.** UV-vis spectra observed within 10 ms after rapid dilution of oxoFe<sup>IV</sup>TDPS (10  $\mu$ M pH 11.5) with 50 mM phosphate/acetate buffer at the target pH (pH was measured after mixing). At high pH,  $\geq 8.0$ , oxoFe<sup>IV</sup>TDPS is observed, while at pH  $< 5$  Fe<sup>III</sup>TDPS<sup>+</sup> was generated. At intermediate pH regimes, mixtures of oxoFe<sup>IV</sup>TDPS and Fe<sup>III</sup>TDPS<sup>+</sup> were observed.

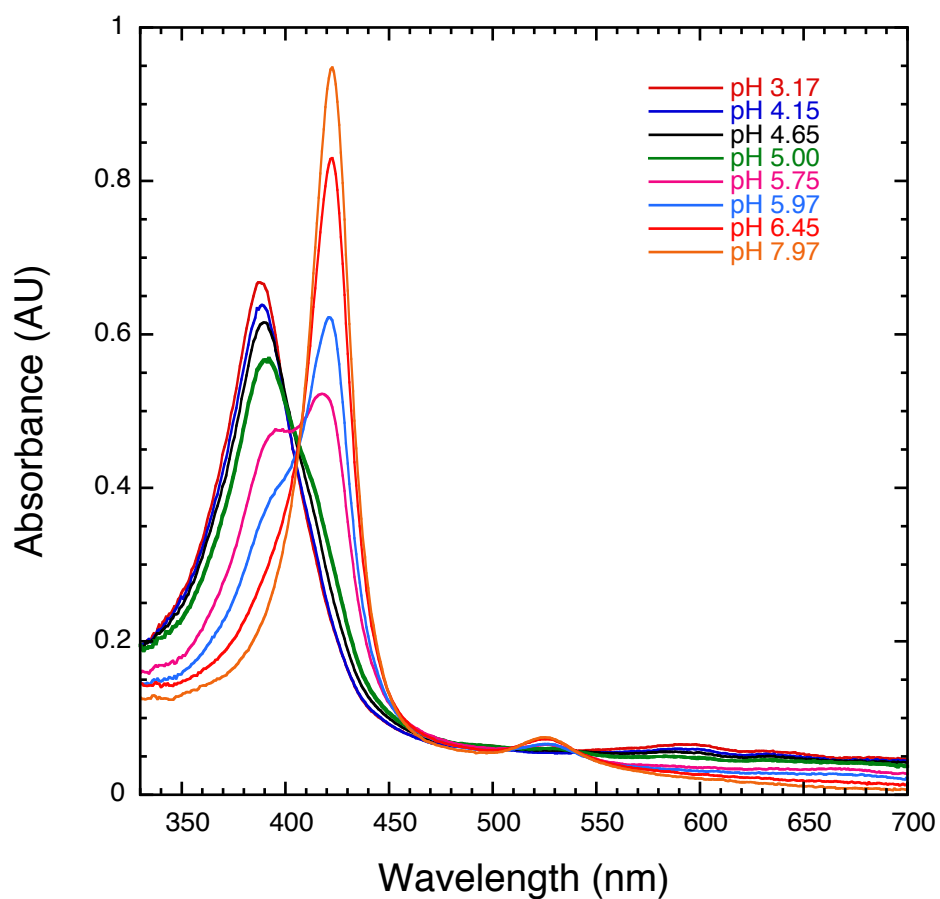

**S10.** UV-vis spectra observed within 10 ms after rapid dilution of oxoFe<sup>IV</sup>TSMP (10  $\mu$ M, pH 11.5) with 50 mM phosphate/acetate buffer at the target pH (pH was measured after mixing). At pH 7.97, oxoFe<sup>IV</sup>TSMP was observed, while at pH < 4 Fe<sup>III</sup>TSMP<sup>+</sup> was generated. At intermediate pH regimes, mixtures of oxoFe<sup>IV</sup>TSMP and Fe<sup>III</sup>TSMP<sup>+</sup> were observed.

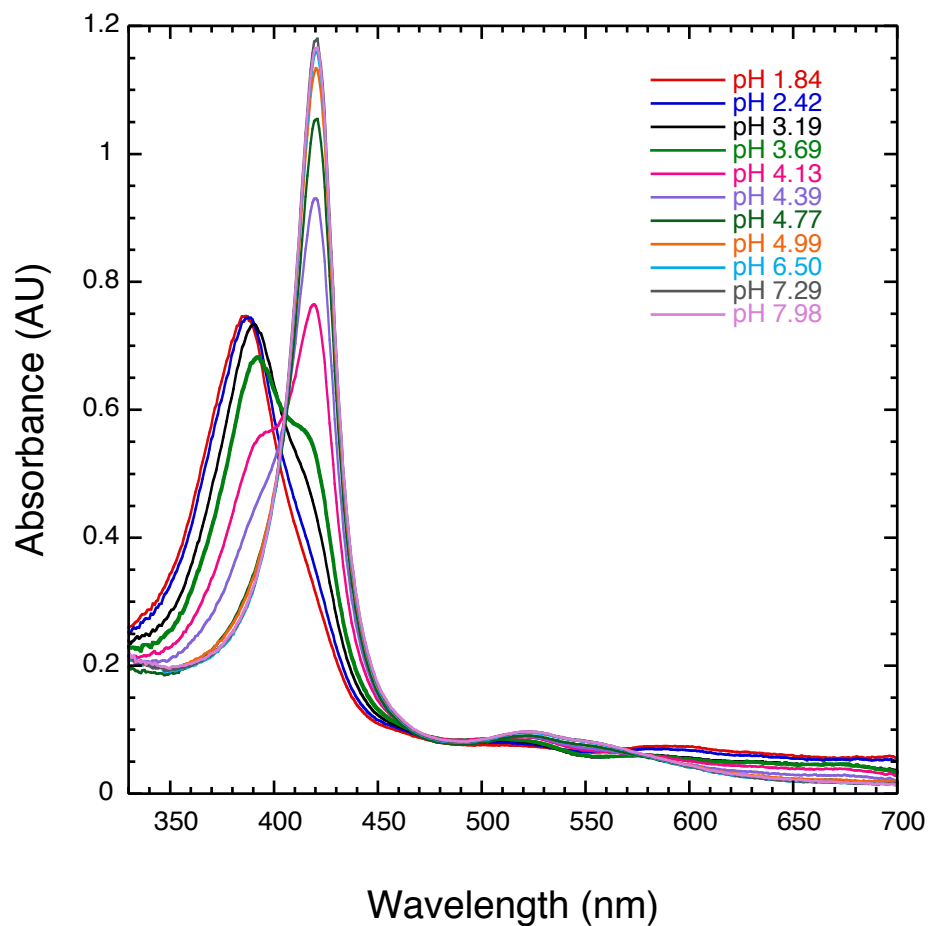

**S11.** UV-vis spectra observed within 10 ms after rapid dilution of oxoFe<sup>IV</sup>TDCIPS (10  $\mu$ M, pH 11.5) with 50 mM phosphate/acetate buffer at the target pH (pH was measured after mixing). At pH > 7, oxoFe<sup>IV</sup>TDCIPS was observed, while at pH < 4 Fe<sup>III</sup>TDCIPS<sup>+</sup> was generated. At intermediate pH regimes, mixtures of oxoFe<sup>IV</sup>TDCIPS and Fe<sup>III</sup>TDCIPS<sup>+</sup> were observed.

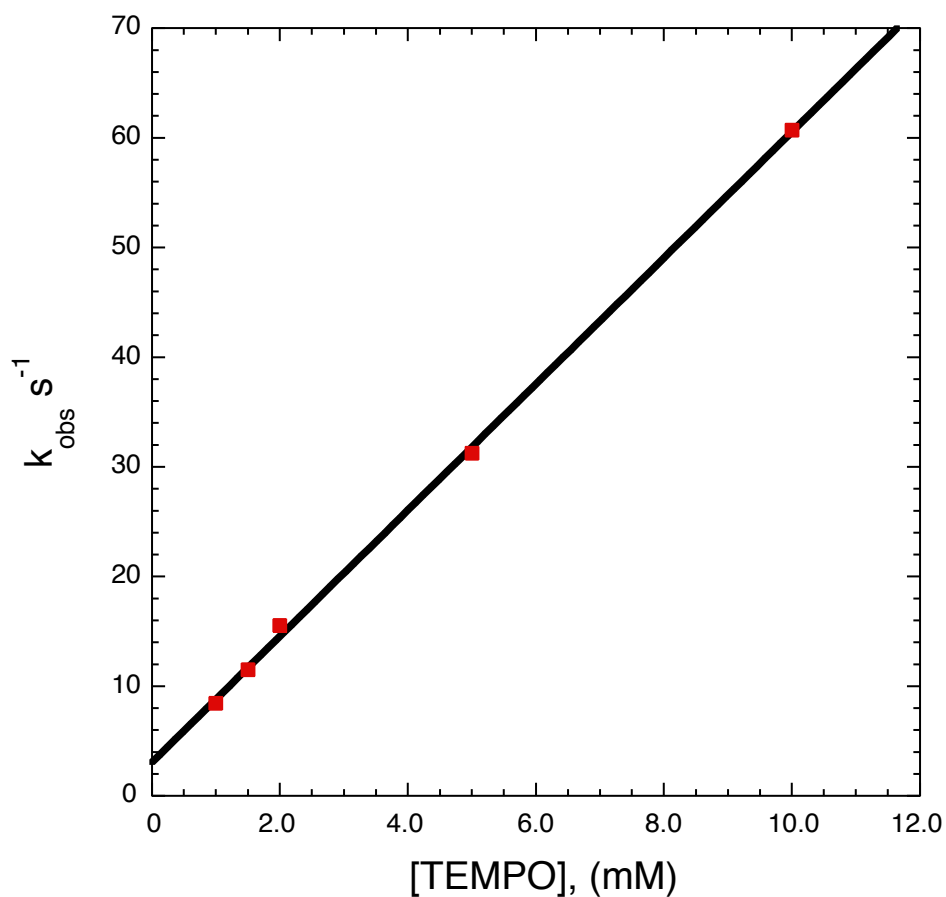

**S12.** Double-mixing stopped-flow experiment in which  $20 \mu\text{M}$  oxoFe<sup>IV</sup>TMPS was generated in the first push by stoichiometric oxidation with *m*CPBA. After a 30 s delay to ensure maximal generation of oxoFe<sup>IV</sup>TMPS, TEMPO radical was added and the pseudo first-order rate constants,  $k_{\text{obs}}$ , were obtained by fitting the decrease in absorbance at 425 nm to a single exponential equation. Plotting  $k_{\text{obs}}$  versus the concentration of TEMPO added yielded a bimolecular rate constant of  $5.75 \pm 0.15 \times 10^4 \text{ M}^{-1}\text{s}^{-1}$  ( $R^2=0.99$ ). The reaction was performed at pH 8.0 in phosphate acetate buffer (50 mM) at 14.5°C. All concentrations presented are final concentrations after mixing.

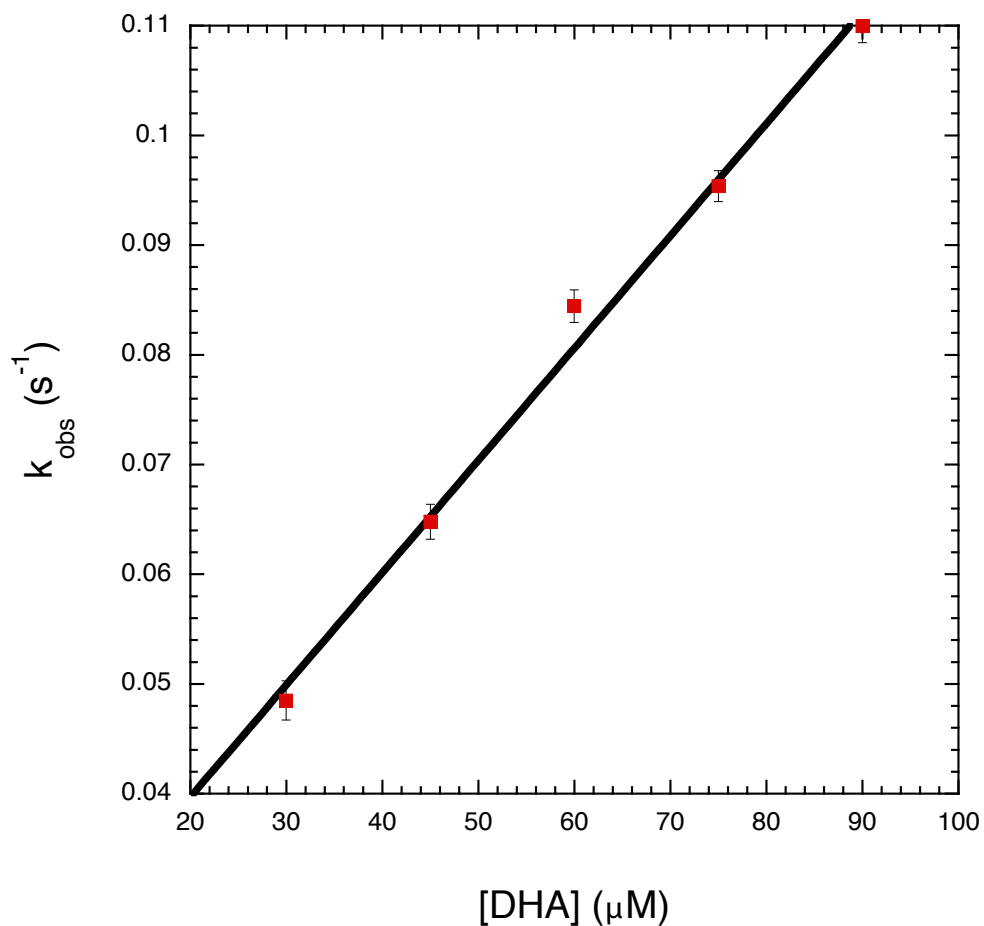

**S13.** Oxidation of dihydroanthracene (DHA) by oxoFe<sup>IV</sup>TMPS<sup>+</sup> in a double mixing, stopped flow experiment. In the first push, 3 μM Fe<sup>III</sup>TMPS was treated with 1 equiv of *m*CPBA, generating oxoFe<sup>IV</sup>TMPS<sup>+</sup>. After a 2 s delay to ensure maximal generation, dihydroanthracene was introduced in a second push using 50 mM phosphate acetate buffer containing 20% acetonitrile at 14.5°C. Plotting concentration of DHA versus the observed rate constant for disappearance of oxoFe<sup>IV</sup>TMPS<sup>+</sup> yielded a bimolecular rate constant for DHA oxidation of  $1023 \pm 52 \text{ M}^{-1}\text{S}^{-1}$  ( $R^2=0.99$ ). All concentrations presented are final after mixing.

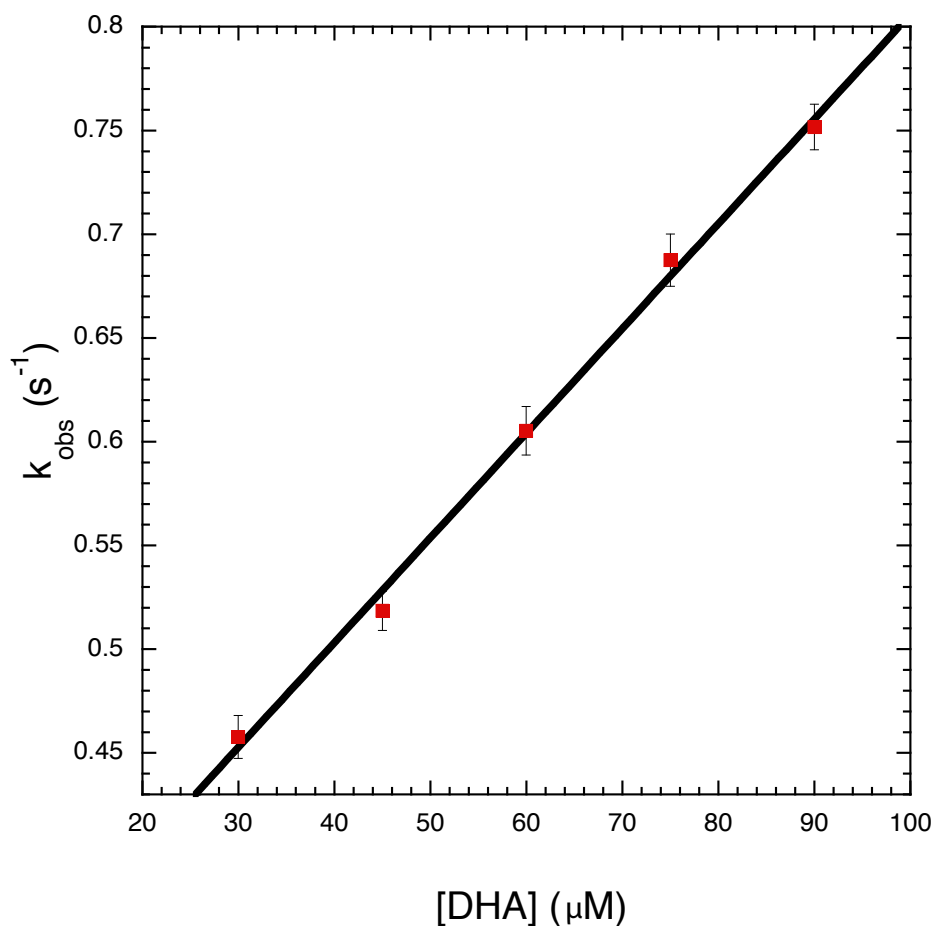

**S14.** Oxidation of DHA by  $\text{oxoFe}^{\text{IV}}\text{TDCIPS}^+$  in a double-mixing stopped-flow experiment. In the first push,  $3 \mu\text{M Fe}^{\text{III}}\text{TDCIPS}$  was treated with 1 equiv of *m*CPBA generating  $\text{oxoFe}^{\text{IV}}\text{TDCIPS}^+$ . After a 3 s delay to ensure maximal generation, DHA was introduced in a second push using 50 mM phosphate acetate buffer containing 20% acetonitrile at  $14.5^\circ\text{C}$ . Plotting concentration of DHA versus the observed rate constant for disappearance of  $\text{oxoFe}^{\text{IV}}\text{TDCIPS}^+$  yielded a bimolecular rate constant for DHA oxidation of  $5015 \pm 170 \text{ M}^{-1}\text{s}^{-1}$  ( $R^2=0.99$ ). All concentrations presented are final after mixing.

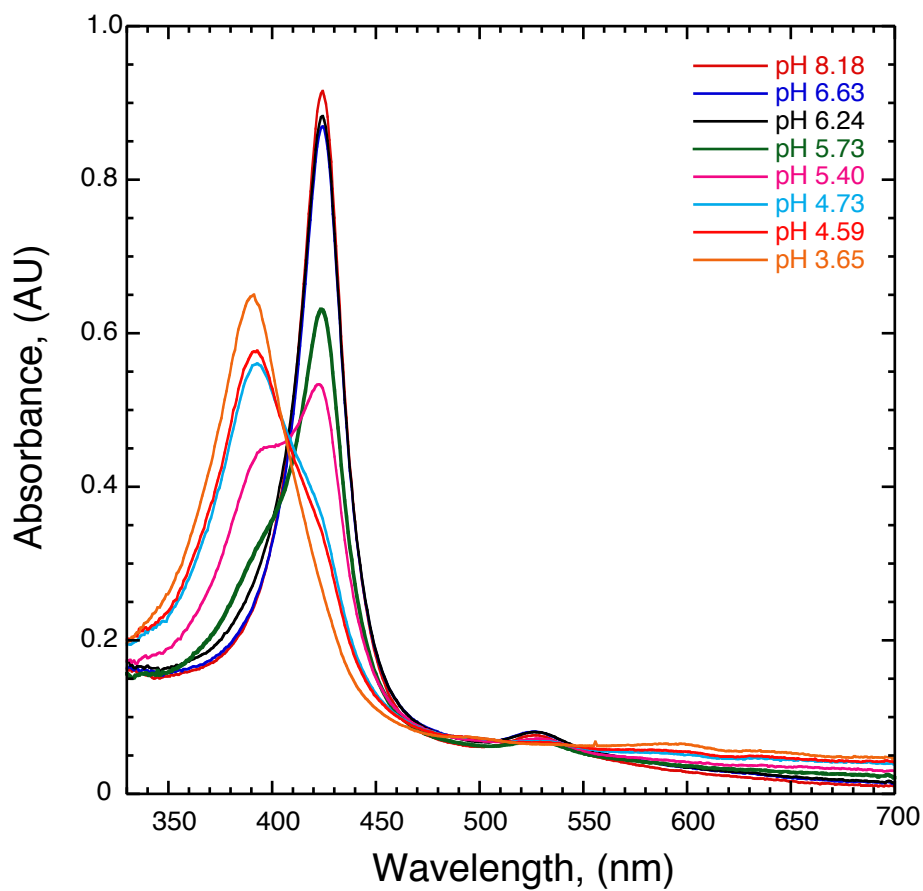

**S15.** UV-vis spectra produced by rapid pH jumping of oxoFe<sup>IV</sup>TMPS (10  $\mu$ M pH 11.5) with 50 mM phosphate/acetate buffer. Note the isobestic conversion from oxoFe<sup>IV</sup>TMPS at high pH to bisquaFe<sup>III</sup>TMPS porphyrin cation radical at low pH.

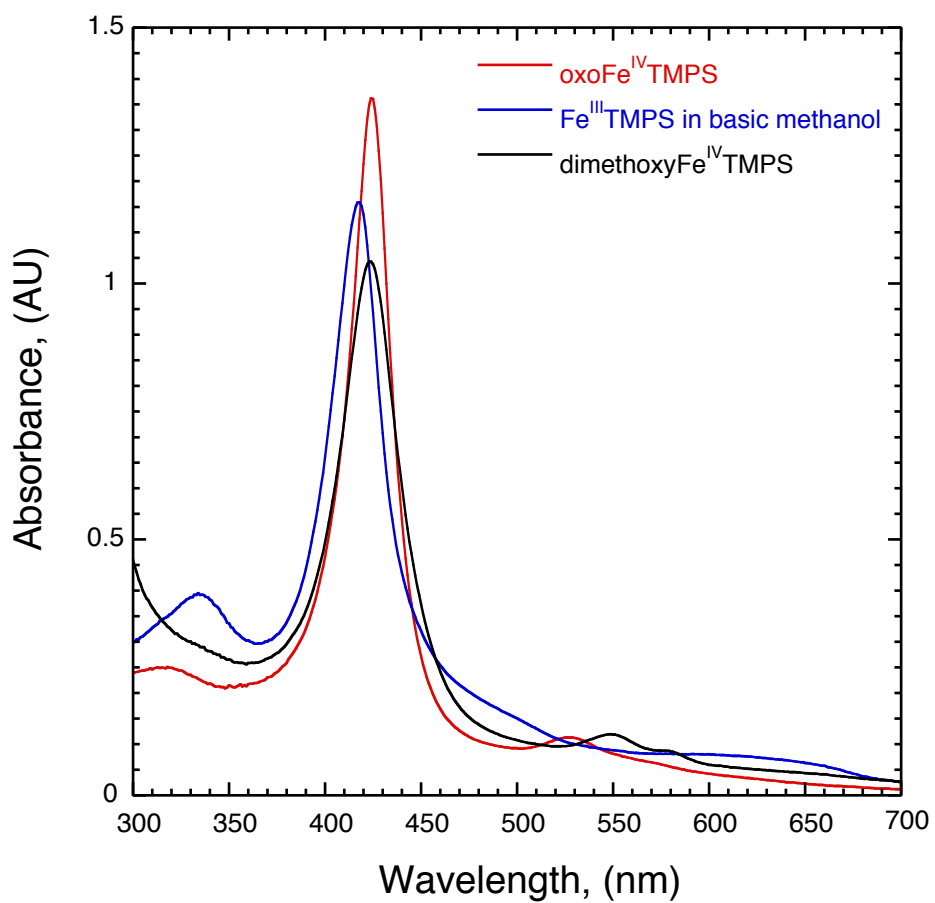

**S16.** UV-vis spectra of 10  $\mu\text{M}$   $\text{Fe}^{\text{III}}\text{TMPS}$  in basic methanol (50mM NaOH), 10  $\mu\text{M}$   $\text{dimethoxyFe}^{\text{IV}}\text{TMPS}$  and 10  $\mu\text{M}$   $\text{oxoFe}^{\text{IV}}\text{TMPS}$  at pH 11.5 in buffered water (50 mM phosphate acetate).<sup>1</sup>



## SVD and EFA Analyses of $pK_a^{\text{obs}}$ Data

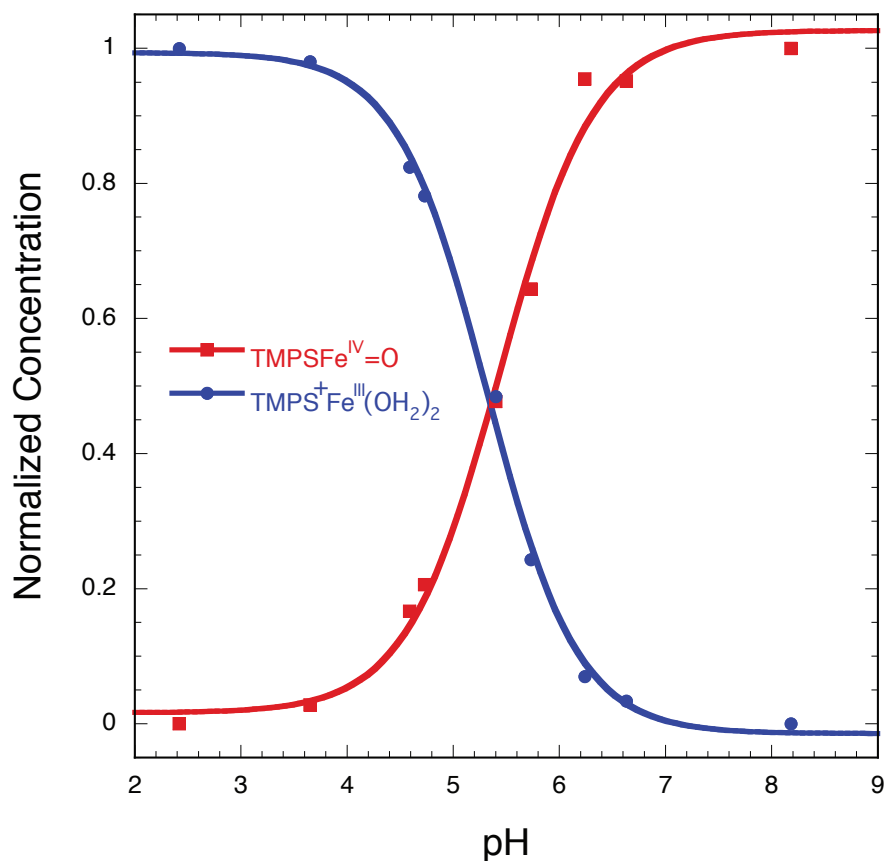

**Figure S17.** Concentration profile for the two observed electromers,  $\text{TMPSFe}^{\text{IV}}=\text{O}$  and  $\text{TMPSFe}^{\text{III}}(\text{OH}_2)_2$ , as determined by model free evolving factor analysis (EFA) of the titration data shown in Figure S15. The  $pK_a^{\text{obs}}$  values determined by fitting the SVD speciation data are  $5.32 \pm 0.04$  ( $\text{TMPSFe}^{\text{III}}(\text{OH}_2)_2$  fit) and  $5.44 \pm 0.07$  ( $\text{TMPSFe}^{\text{IV}}=\text{O}$  fit).

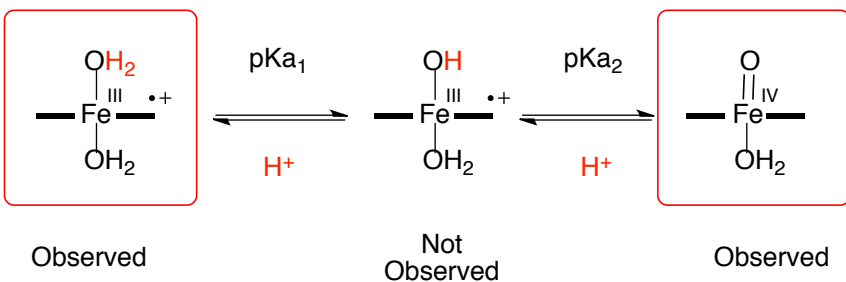

**Scheme S1.** Two state equilibrium model proposed for water-soluble compound II mimics.

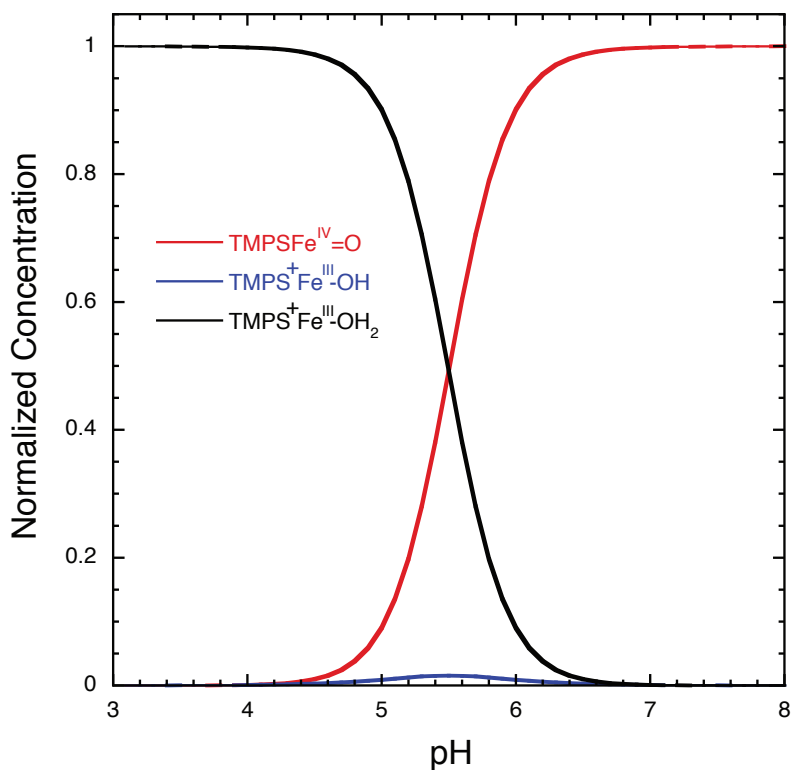

**Figure S18.** Modeled speciation plot for TMPS-II over a pH range of 3 to 8 using the equilibrium model shown in Scheme S1 with  $pK_{a1}=7$  and  $pK_{a2}=4$ , assuming a two-proton equilibrium. Note the lack of appreciable buildup of the mono-protonated  $\text{HO-Fe}^{\text{III}}\text{TMPS}^+$  predicted by these  $pK_a$  values ( $< 1.6\%$  of total porphyrin species in solution).

$$\text{Concentration} = \text{Con}_{\text{Max}} + (\text{Con}_{\text{Min}} - \text{Con}_{\text{Max}}) / (1 + \exp((\text{pH} - \text{p}K_{a_{\text{obs}}})/dx))$$

**Equation S1.** Boltzmann sigmoidal equation where  $\text{Con}_{\text{Max}}$  = the maximum observed concentration,  $\text{Con}_{\text{Min}}$  = the minimum observed concentration, and  $dx$  is the rate term for the change in concentration relative to the change in pH which can be used to ascertain the number of protons involved in the titration.

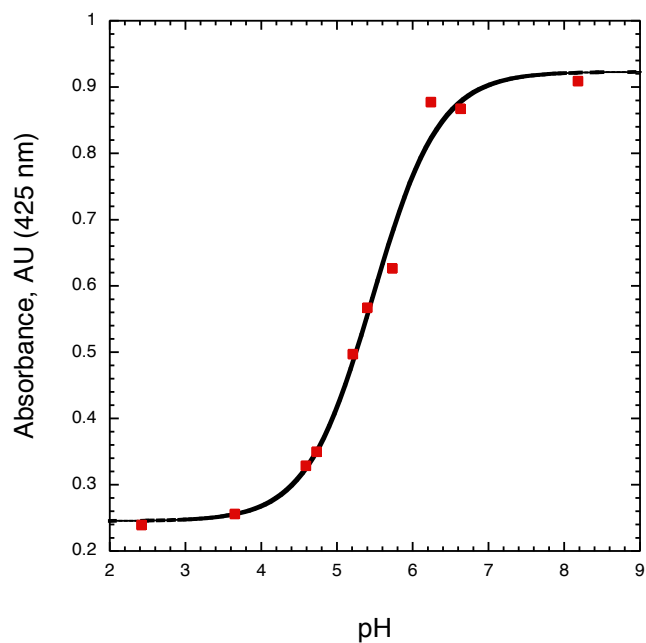

**Figure S19.** Boltzmann sigmoidal fit (eq S1) for the titration presented in Figure S15.  $Con_{Max} = 0.92 \pm 0.03$ ,  $Con_{Min} = 0.25 \pm 0.3$ ,  $pKa = 5.47 \pm 0.08$ , and  $dx = 0.44 \pm 0.07$ .

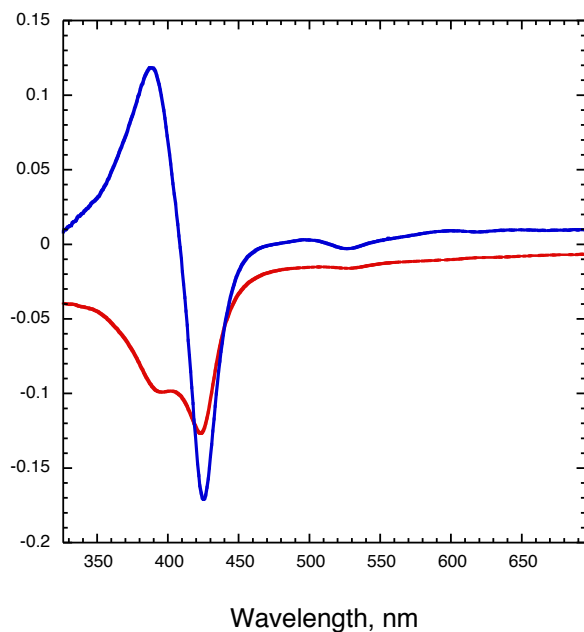

**Figure S20.** Abstract spectra resulting from the SVD analysis of the titration results of FeTMPS II in Figure S15. Only two significant non-zero singular values were obtained from SVD analysis.

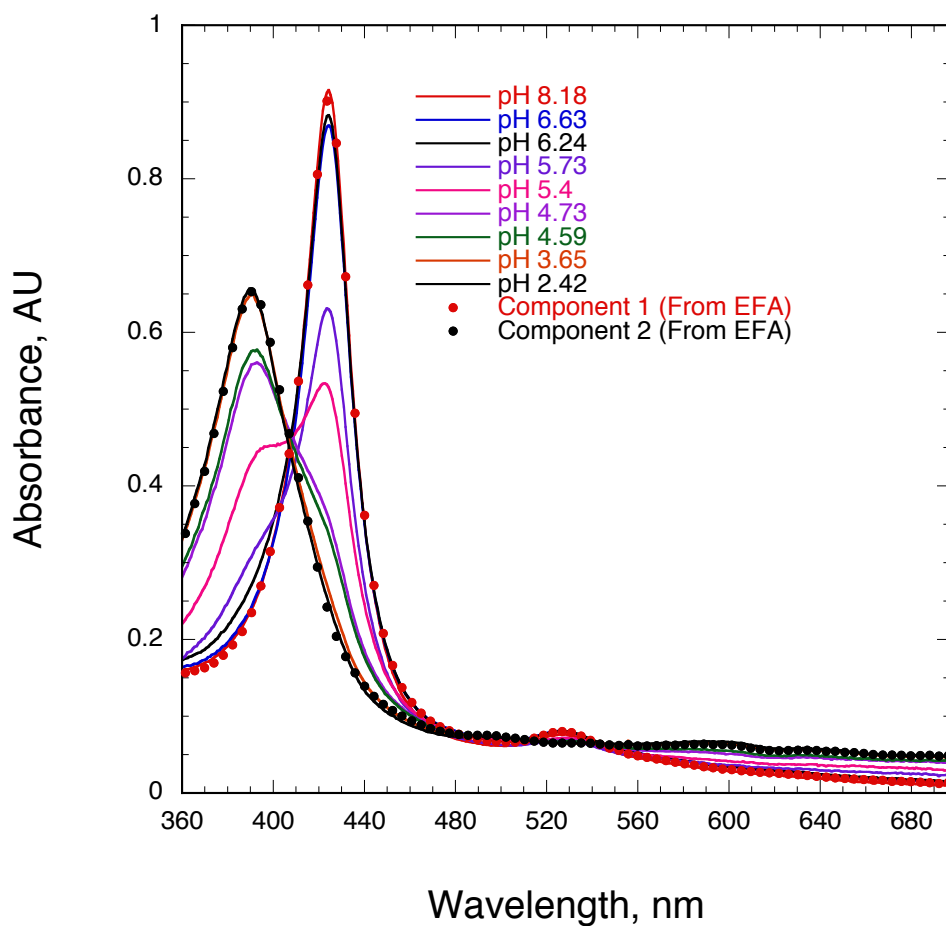

**Figure S21.** UV-vis spectra of the two components,  $\text{TMPSFe}^{\text{IV}}=\text{O}$  and  $\text{TMPSFe}^{\text{III}}(\text{OH}_2)_2$  (red and black dotted lines, respectively), reproduced using model free evolving factor analysis (EFA) of the titration data overlaid with the experimental titration data for FeTMPS-II.

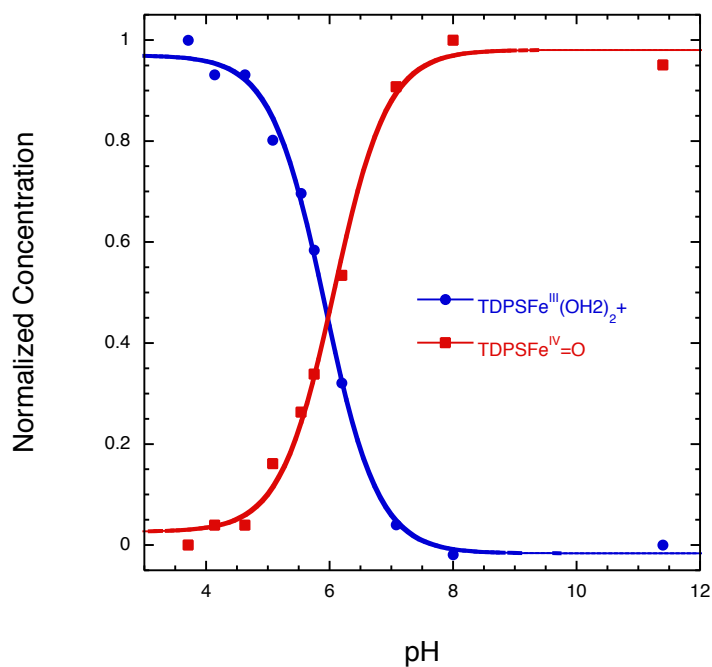

**Figure S22.** Concentration profile for the two observed electromers of FeTDPS-II as determined by model free evolving factor analysis (EFA) of the titration data shown in Figure S9. The observed  $pK_a^{\text{obs}}$  values determined by fitting the SVD speciation data are  $5.92 \pm 0.04$  (TDPSFe<sup>III</sup>(OH<sub>2</sub>)<sub>2</sub><sup>+</sup> fit) and  $6.07 \pm 0.05$  (TDPSFe<sup>IV</sup>=O fit),  $dx = 0.50 \pm 0.04$ .

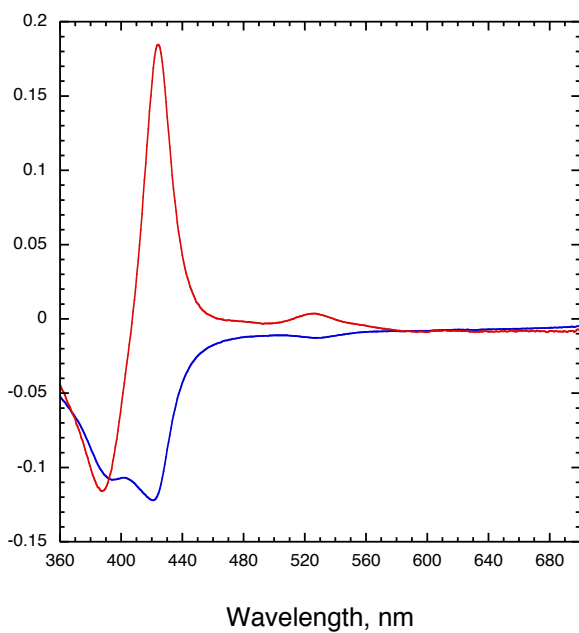

**Figure S23.** Abstract spectra resulting from the SVD analysis of the titration results for FeTDPS-II from Figure S9. Only two significant non-zero singular values were obtained from SVD analysis.

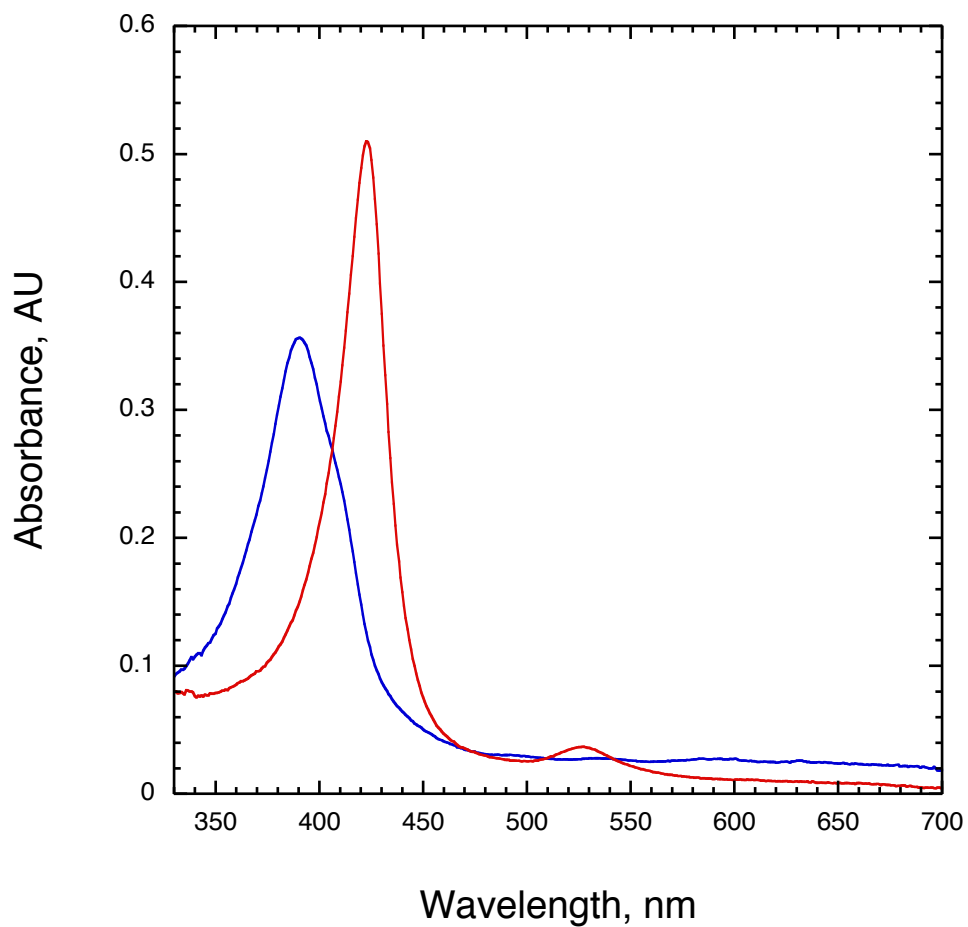

**Figure S24.** FeTDPS-II electromer spectra reproduced using model free evolving factor analysis (EFA) of the titration data in Figure S9.

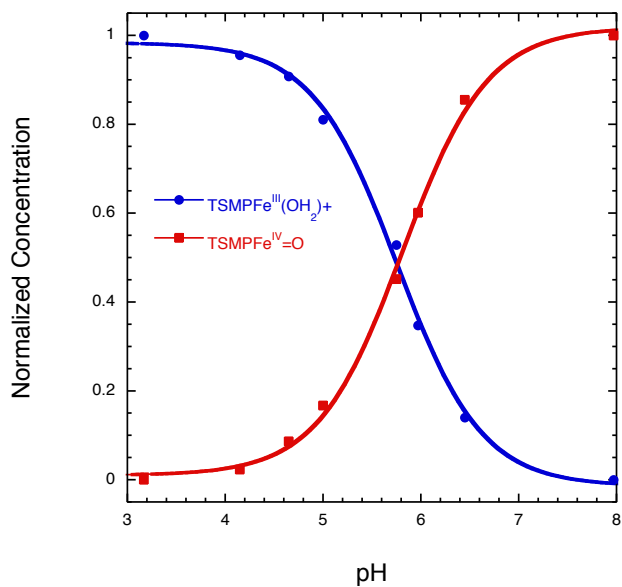

**Figure S25.** Concentration profile for the two observed electromers of FeTSMP-II as determined by model free evolving factor analysis (EFA) of the titration data shown in Figure S10. The observed  $pK_a^{\text{obs}}$  values determined by fitting the SVD speciation data are  $5.76 \pm 0.04$  (TSMPPe<sup>III</sup>(OH<sub>2</sub>)<sub>2</sub> fit) and  $5.81 \pm 0.04$  (TSMPPe<sup>IV</sup>=O fit),  $dx = 0.36 \pm 0.03$ .

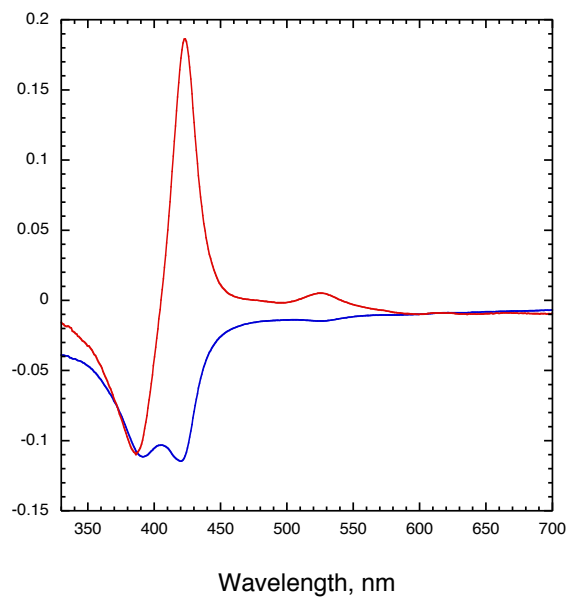

**Figure S26.** Abstract spectra resulting from the SVD analysis of the titration results for FeTSMP-II in Figure S10. Only two significant non-zero singular values were obtained from SVD analysis.



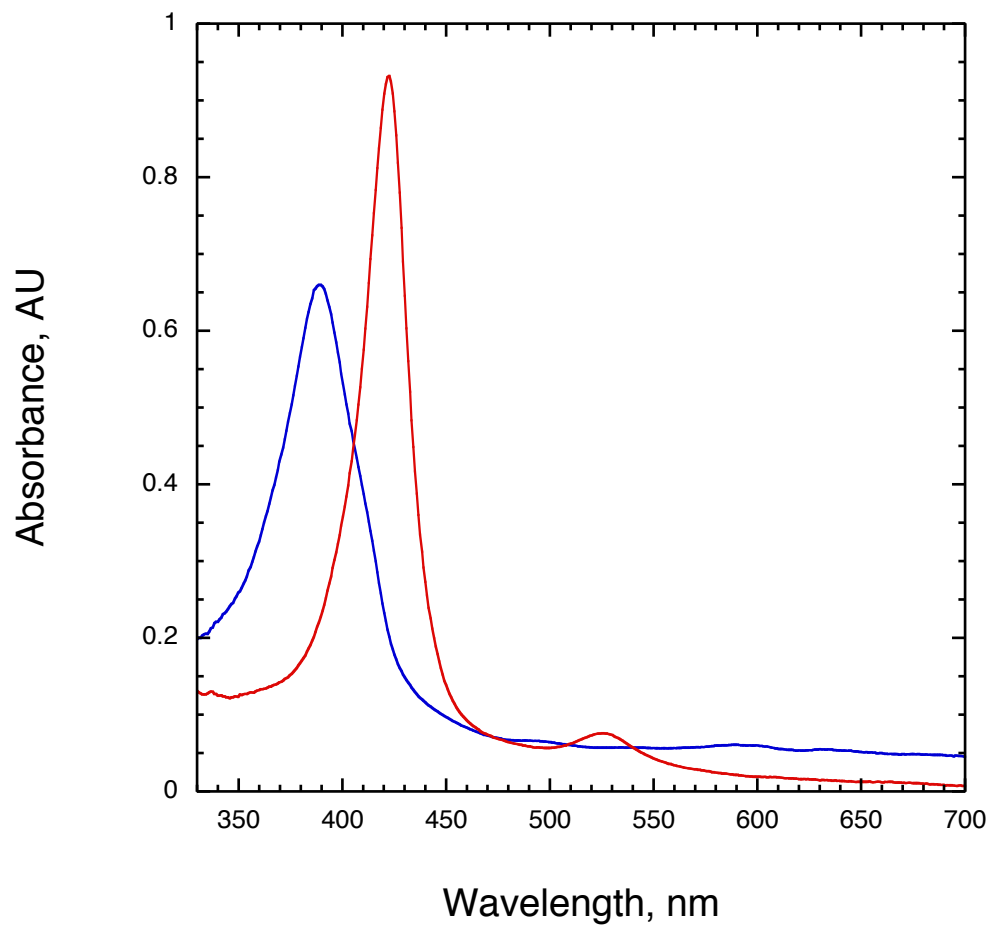

**Figure S27.** FeTSMP-II electromer spectra reproduced using model free evolving factor analysis (EFA) of the titration data.

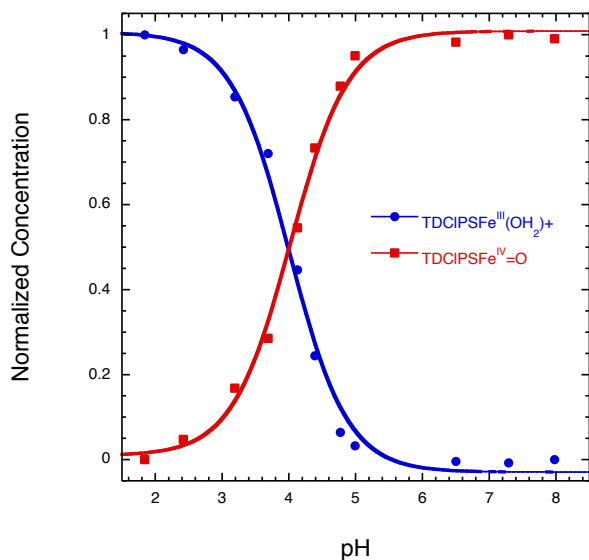

**Figure S28.** Concentration profile for the two observed electromers of FeTDCIPS II as determined by model free evolving factor analysis (EFA) of the titration data shown in Figure S11. The observed  $pK_a^{\text{obs}}$  determined by fitting the SVD speciation data are  $4.01 \pm 0.05$  (TDCIPSF $^{\text{III}}$ (OH $_2$ ) $_2$  fit) and  $4.02 \pm 0.04$  (TDCIPS Fe $^{\text{IV}}$ =O fit),  $dx = 0.36 \pm 0.03$ .

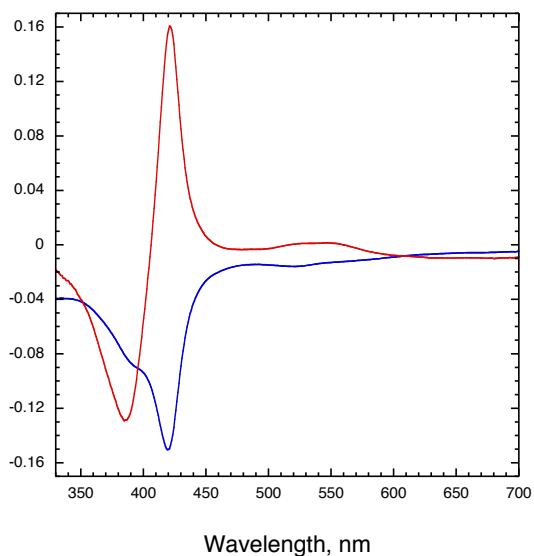

**Figure S29.** Abstract Spectra resulting from the SVD analysis of the titration results for FeTDCIPS II which are shown in Figure S11. Only two significant non-zero singular values were obtained from SVD analysis.

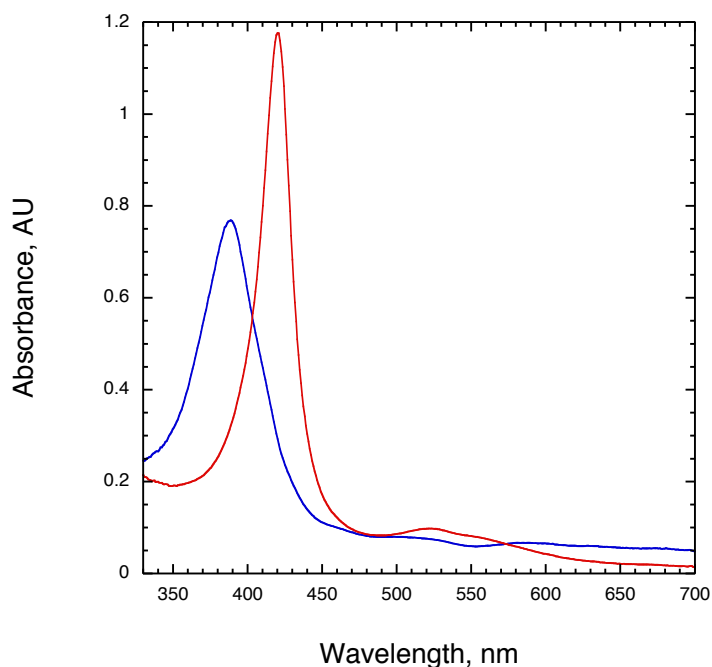

**Figure S30.** FeTDCIPS-II electromer spectra reproduced using model free evolving factor analysis (EFA) of the titration data.

### Derivation of equation 2 and calculation of $D(OH_2)$ .

$$D(OH_2) = -\Delta G_{Tot} = -(\Delta G_a + \Delta G_b)$$

$$D(OH_2) = -(\{-23.06 \cdot E'_{Cpd-I} - 1.37 \cdot pK_a2 - 57\} + \{-1.37 \cdot pK_a1 + 1.37 \cdot pH\})$$

$$D(OH_2) = -(-23.06 \cdot E'_{Cpd-I} - 1.37 \cdot (pK_a2 + pK_a1) + 1.37 \cdot pH - 57), \text{ where } pK_a^{obs} = (pK_a2 + pK_a1) / 2$$

$$D(OH_2) = 23.06 \cdot E'_{Cpd-I} + 1.37 \cdot (2 pK_a^{obs}) - 1.37 \cdot pH + 57 \quad (\text{eq 2})$$

$D(OH_2)$  parameters were calculated using the following  $E'$  for  $P^+-Fe^{IV}=O/P-Fe^{IV}=O$ : FeTSMP 1.097 V; FeTDPS 1.025 V; FeTMPS 1.063 V; FeTDCIPS 1.257 V vs NHE.

(FeTSMP)  $D(OH_2)$  = 91.5 kcal/mol at pH 5.0

(FeTMPS)  $D(OH_2)$  = 89.5 kcal/mol at pH 5.0

(FeTDPS)  $D(OH_2)$  = 91 kcal/mol at pH 5.0

(FeTDCIPS)  $D(OH_2)$  = 90.5 kcal/mol at pH 5.0

## References

1. Bell, S. R. Modeling Heme Monooxygenases with Water-Soluble Iron Porphyrins. PhD Thesis, Princeton University, Princeton, 2010.
